# Supplementary material for: Acid Treatments of Ti-Based Metallic Glasses for Improving Corrosion Resistance in Implant Applications
Source: MDPI journal article supplement (doi:10.3390/met14020241), 2024-02-16
Supplement: s1 [file s1]

## Supplementary information

### Acid treatments of Ti-based metallic glasses for improving corrosion resistance in implant applications

Nora Fernández-Navas <sup>1,2</sup>, Viktoriia Shtefan <sup>1,3</sup>, Martin Hantusch <sup>1</sup> and Annett Gebert <sup>1\*</sup>

<sup>1</sup>Leibniz-Institute for Solid State and Materials Research Dresden (Leibniz IFW Dresden), Helmholtzstr. 20, 01069 Dresden, Germany; n.fernandez.navas@ifw-dresden.de; v.shtefan@ifw-dresden.de; m.hantusch@ifw-dresden.de; a.gebert@ifw-dresden.de

<sup>2</sup>Faculty of Mechanical Science and Engineering, TU Dresden, Helmholtzstr. 10, 01069, Dresden, Germany; n.fernandez.navas@ifw-dresden.de

<sup>3</sup>Educational and Scientific Institute of Chemical Technologies and Engineering, National Technical University "Kharkiv Polytechnic Institute", Kyrpychova Str. 2, 61002 Kharkiv, Ukraine; v.shtefan@ifw-dresden.de

\*Correspondence: [a.gebert@ifw-dresden.de](mailto:a.gebert@ifw-dresden.de)

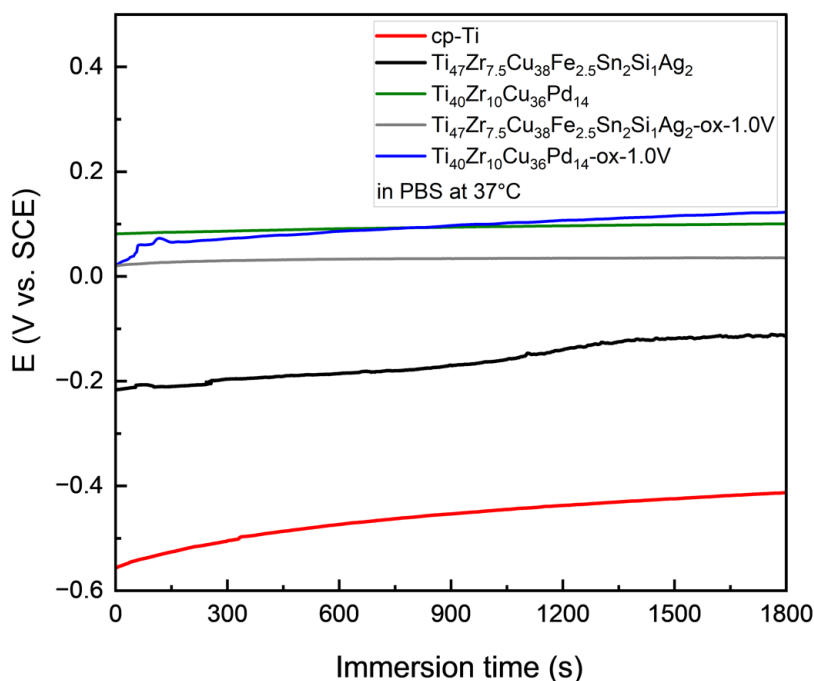

**Figure S1** Representative OCP curves measured for 30 min in PBS (pH 7.4) at 37 °C for Ti sheets in as-polished, air-aged states and glassy Ti<sub>47</sub>Cu<sub>38</sub>Zr<sub>7.5</sub>Fe<sub>2.5</sub>Sn<sub>2</sub>Si<sub>1</sub>Ag<sub>2</sub> and Ti<sub>40</sub>Zr<sub>10</sub>Cu<sub>34</sub>Pd<sub>14</sub>Sn<sub>2</sub> ribbon samples in as-spun state and after potentiostatic polarization treatment in 5 M HNO<sub>3</sub> solution at 60 °C at 1 V vs. SCE for 60 min.
